# Supplementary material for: Ecological insights and conservation strategies for the data-deficient Indian horseshoe crab Tachypleus gigas (Müller, 1785) along the Odisha coast, India
Source: Research Square preprint supplement (doi:10.21203/rs.3.rs-6659913/v1), 2025-06-23
Supplement: Supplementary file 1 [file acdbaa3dc38b7cd8bc4b441b.pdf]

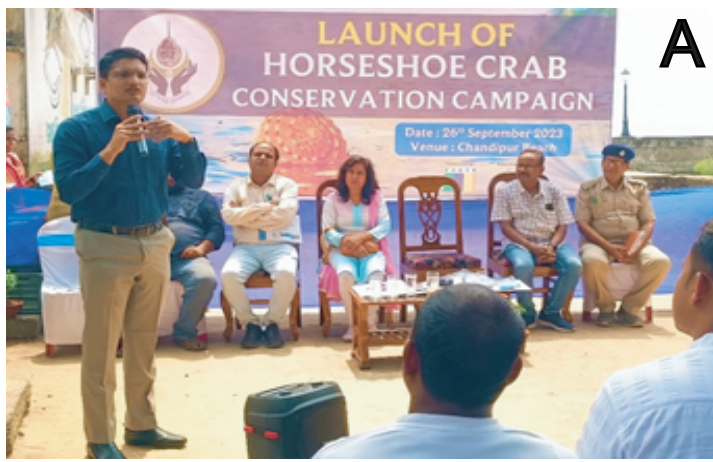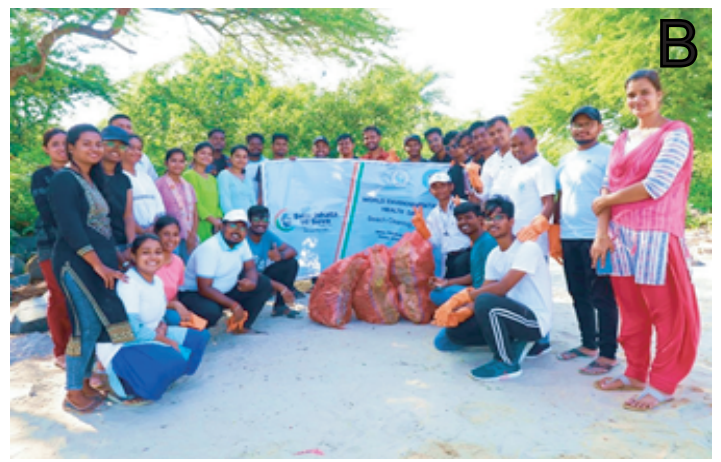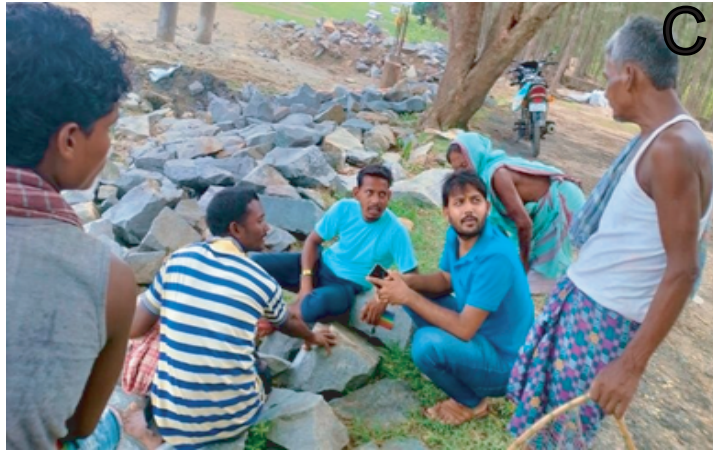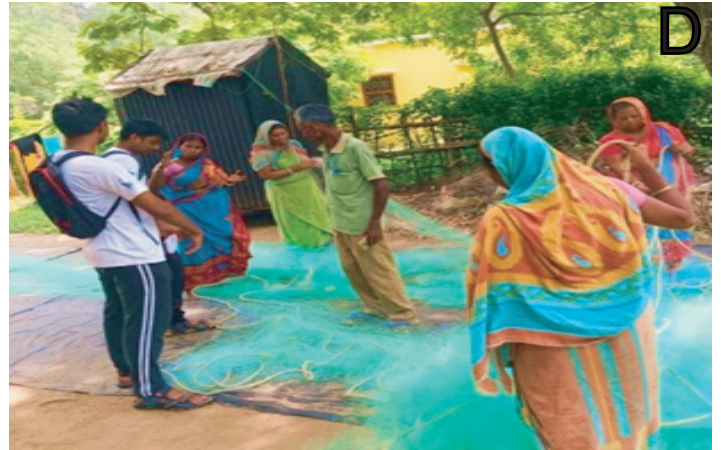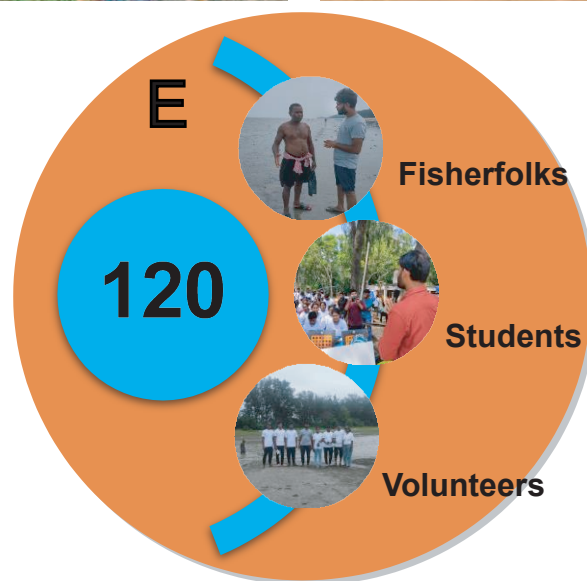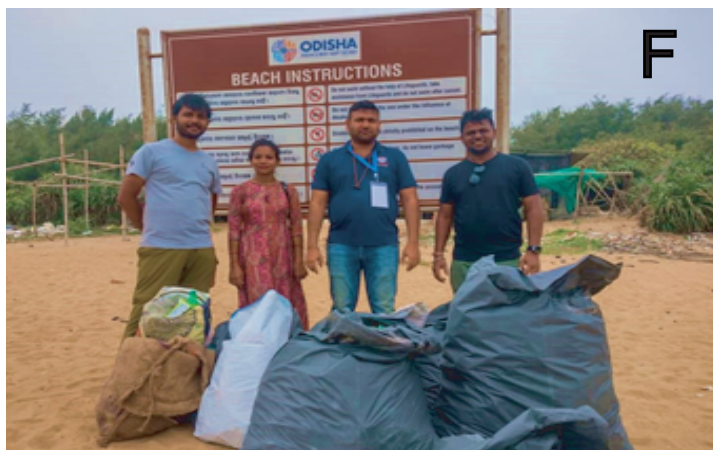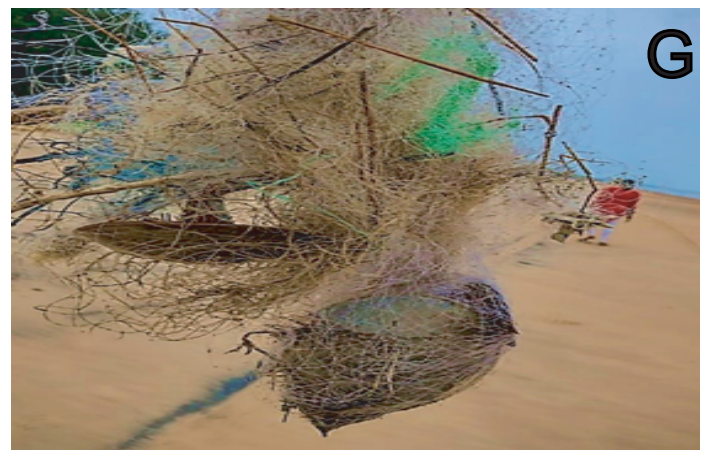

Supp. Figure 1: Highlights of the Horseshoe Crab Conservation Campaign. A and B show the inauguration ceremony, while C and D illustrate a survey of 235 respondents conducted across rescue stations. E highlights engagement with fisherfolk, students, and volunteers (N=120) participating in community-based conservation efforts. Panel F depicts a beach cleaning event conducted at Chandipur Beach during the non-monsoon season, and Panel G shows a horseshoe crab entangled in a fishing net, emphasizing the threats faced by the species.
